# Supplementary material for: The Dynamic Distribution of Wolbachia and Rickettsia in AsiaII1 Bemisia tabaci
Source: MDPI journal article supplement (doi:10.3390/insects14040401), 2023-04-21
Supplement: s1 [file s1]

**Table S1.** The primers and reaction program for PCR detection of endosymbionts in Asia II1 *Bemisia tabaci*.

| Symbiont                            | Primer name  | Primer sequence (5'-3')         | amplicon size (bp) | Reaction program                                                                                    |
|-------------------------------------|--------------|---------------------------------|--------------------|-----------------------------------------------------------------------------------------------------|
| <i>Portiera</i> <sup>a</sup>        | 28 F         | TGCAAGTCGAGCGGCATCAT            | 1000               | 95°C 1min; 60°C 1min, 72°C 1min (5 cycles); 95°C 1min, 58°C 1min, 72°C 1min (25 cycles); 72°C 20min |
|                                     | 1098 R       | AAAGTTCCCGCCTTATGCGT            |                    |                                                                                                     |
| <i>Hamiltonella</i> <sup>b</sup>    | Ham F        | TGAGTAAAGTCTGGAATCTGG           | 700                | 95°C 1min; 60°C 1min, 72°C 1min (5 cycles); 95°C 1min, 58°C 1min, 72°C 1min (30 cycles); 72°C 20min |
|                                     | Ham R        | AGTTCAAGACCGCAACCTC             |                    |                                                                                                     |
| <i>Cardinium</i> <sup>c</sup>       | CFB F        | GCGGTGTAAAATGAGCGTG             | 400                | 94°C 4min; 94°C 40s, 57°C 40s, 72°C 45s (35 cycles); 72°C 5min                                      |
|                                     | CFB R        | ACCTMTTCTTAACTCAAGCCT           |                    |                                                                                                     |
| <i>Rickettsia</i> <sup>d</sup>      | Rb F         | GCTCAGAACGAACGCTATC             | 900                | 95°C 2min; 92°C 30s, 58°C 30s, 72°C 30s (30 cycles); 72°C 5min                                      |
|                                     | Rb R         | GAAGGAAAGCATCTCTGC              |                    |                                                                                                     |
| <i>Arsenophonus</i> <sup>e</sup>    | Ars23S-1     | CGTTTGATGAATTCATAGTCAAA         | 600                | 94°C 5min; 94°C 30s, 52°C 30s, 72°C 1min (35 cycles); 72°C 5min                                     |
|                                     | Ars23S-2     | GGTCCTCCAGTTAGTGTACCCAA<br>C    |                    |                                                                                                     |
| <i>Fritschea</i> <sup>f</sup>       | U23F         | GATGCCTTGGCATTGATAGGCGAT        | 600                | 95°C 5min; 94°C 1min, 55°C 1min, 72°C 1.5min (35 cycles); 72°C 5min                                 |
|                                     | 23SIGR       | GAAGGA<br>TGGCTCATCATGCAAAAGGCA |                    |                                                                                                     |
| <i>Hemipteriphilus</i> <sup>g</sup> | OLO F        | GCTCAGAACGAACGCTRKC             | 700                | 94°C 4min; 94°C 30s, 60°C 1min, 72°C 2min (35 cycles); 72°C 5min                                    |
|                                     | OLO R        | TTCGCCACTGGTGTTCCTC             |                    |                                                                                                     |
| <i>Wolbachia</i> <sup>h</sup>       | wsp-81F      | TGGTCCAATAAGTGATGAAGAAAC        | 600                | 95°C 3min; 94°C 35s, 55°C 30s, 72°C 30s (40 cycles); 72°C 10min                                     |
|                                     | wsp-691<br>R | AAAAATTAAACGCTACTCCA            |                    |                                                                                                     |

<sup>a</sup> Sequences obtained from Zchori-Fein and Brown. (2002) [41].

<sup>b</sup> Sequences obtained from Chiel et al. (2007) [42].

<sup>c</sup> Sequences obtained from Weeks et al. (2003) [43].

<sup>d</sup> Sequences obtained from Gottlieb et al. (2006) [26].

<sup>e</sup> Sequences obtained from Thao and Baumann (2004) [44].

<sup>f</sup> Sequences obtained from Everett et al. (2005) [45].

<sup>g</sup> Sequences obtained from Bing et al. (2013) [46].

<sup>h</sup> Sequences obtained from Zhou et al. (1998) [27].

**Table S2** The information of oligonucleotide primers used in quantitative PCR in AsiaII1 *Bemisia tabaci*

| Gene              | Primer name | Primer sequence           | Reference |
|-------------------|-------------|---------------------------|-----------|
| <i>Wolbachia</i>  | Cox14F      | GCCAGTATTTGGTTATATGGGAATG | [28]      |
| <i>coxA</i>       | Cox14R      | CTCGCTAAGCCCAACAGTA       |           |
| <i>Rickettsia</i> | gltA-F      | CGGATTGCTTTACTTAC         | [30]      |
| <i>gltA</i>       | gltA-R      | AAATACGCCACCTCTA          |           |
| $\beta$ -Actin    | Actin-QF    | TCTTCCAGCCATCC TTCTTG     | [29]      |
|                   | Actin-QR    | CGGTGATTTCCTTCTGCA TT     |           |

### PCR detection of secondary endosymbionts in Asia II1 whitefly

In order to evaluation the infection species and status of endosymbionts in the Asia II1 whitefly , newly emerged adults were randomly selected in the experiment population were measured by PCR with special primers of 16S *rRNA*, 23S *rRNA* and *wsp* genes of endosymbionts. Results revealed that the experiment population of Asia II1 whitefly was infected with one primary endosymbiont (*Portiera*) and four secondary endosymbionts (*Rickettsia*, *Wolbachia*, *Hemipteriphilus*, *Fritschea*), but not infected with *Cardinium* and *Hamiltonella*. The infection percentages of *Rickettsia* and *Hemipteriphilus* in whitefly adults were 100%, while The infection percentages of *Wolbachia* and *Fritschea* were respectively 83.3% and 46.67%, and the infection rate of males was higher than that of females.

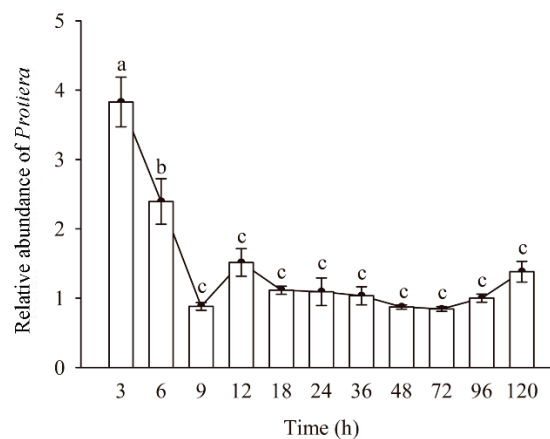

**Figure S1** The relative abundance of *Portiera* in different times eggs of *B. tabaci*.

Error bars represent the standard error of the mean; Means marked with different letters are significantly different from each other ( $P \leq 0.05$ ).  $n= 3$  biological replicates. A  $\beta$  - actin whitefly gene was selected as an internal control for data standardization and quantification

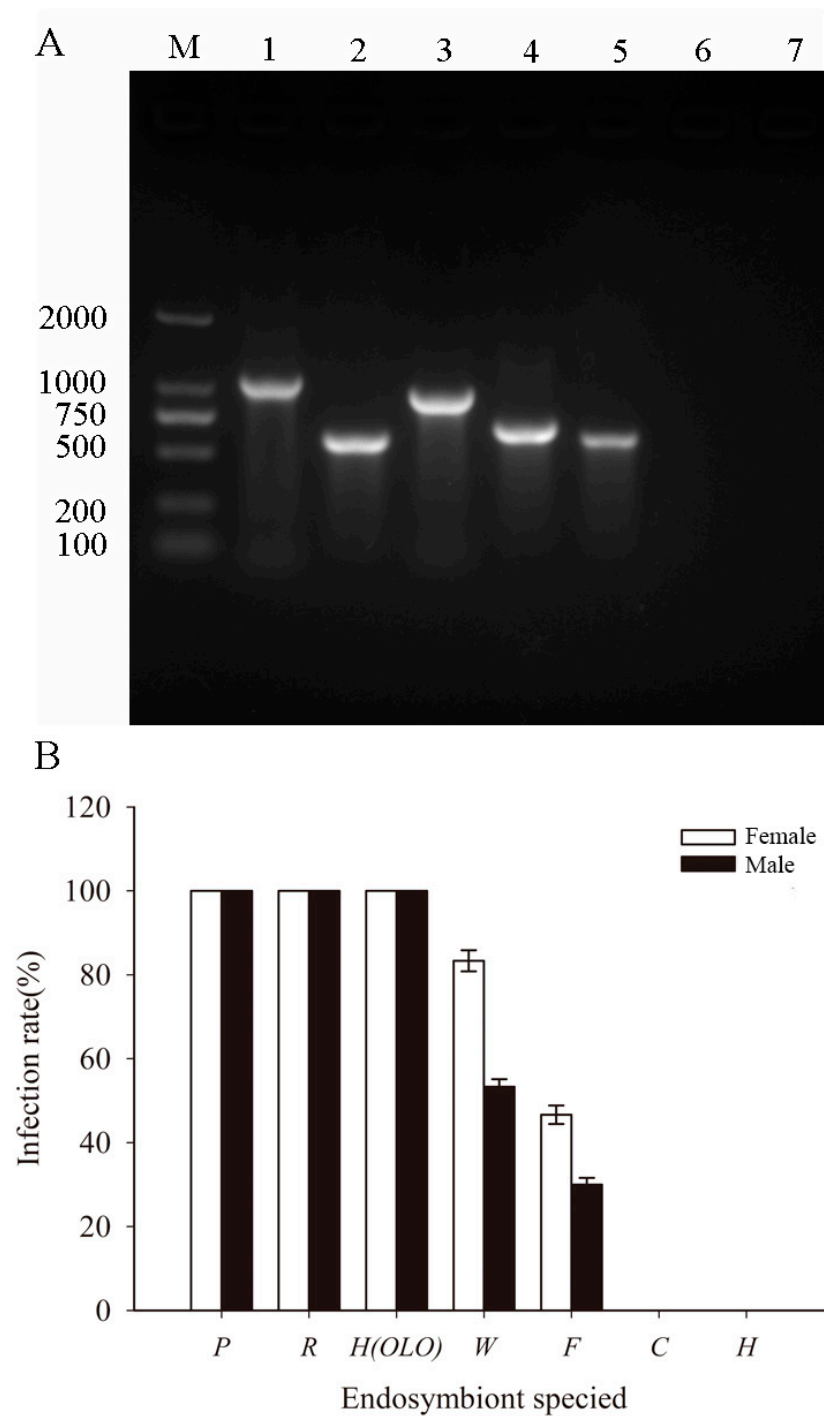

**Figure S2** The endosymbionts information of Asia II 1 whitefly *B. tabaci*

Note: A: The endosymbiont species infected in whitefly, M: DNA marker; 1: *Portiera*; 2: *Wolbachia*; 3: *Rickettsia*; 4: *Hemipteriphilus*; 5: *Fritschea*; 6: *Cardinium*; 7: *Hamiltonella*. B: The endosymbionts infection rates of whitefly. P: *Portiera*; R: *Rickettsia*; H(OLO): *Hemipteriphilus*; W: *Wolbachia*; F: *Fritschea*; C: *Cardinium*; H: *Hamiltonella*. all error bars

represent standard error of mean.

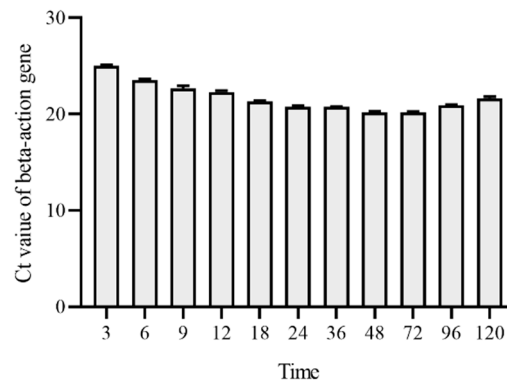

**Figure S3** Ct value of beta-actin gene in whitefly eggs at different time

Error bars represent the standard error of the mean;  $n=3$  biological replicates.

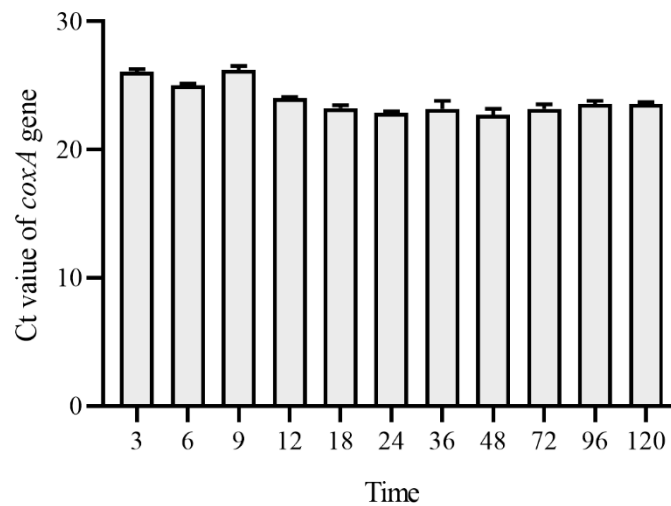

**Figure S4** Ct value of *coxA* gene in whitefly eggs at different time

Error bars represent the standard error of the mean;  $n=3$  biological replicates.

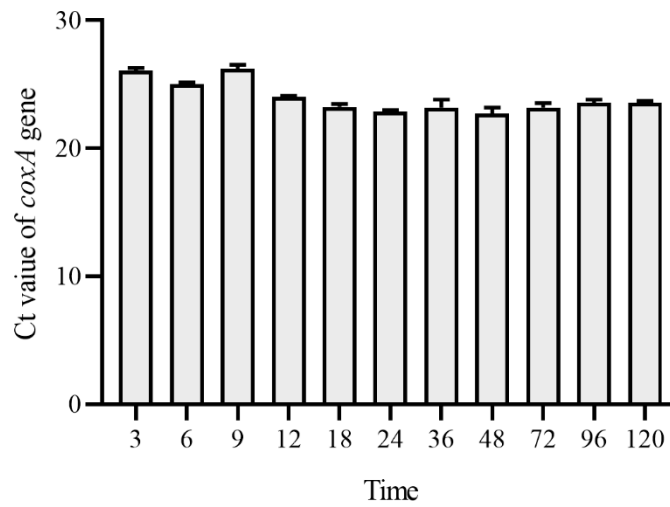

**Figure S5** Ct value of *glbA* gene in whitefly eggs at different time

Error bars represent the standard error of the mean;  $n=3$  biological replicates.

## Supplementary file 2

### Biological explanation of dynamic change of symbiotic bacteria titer

According to the biological characteristics of symbiotic bacteria, the reasons for the dynamic change of *Rickettsia* and *Wolbachia* titers were as follows: The titers of *Rickettsia* and *Wolbachia* decreased from 3 h to 9 h, and the fluorescence intensity of *Rickettsia* and *Wolbachia* also decreased from 3 h to 9 h by FISH detection. The main reason why the titer of *Rickettsia* and *Wolbachia* decreased was that the egg stalk could not provide a better cell environment, which *Rickettsia* and *Wolbachia* were intracellular symbiotic bacteria. When *Rickettsia* and *Wolbachia* enter the egg from the egg stalk, the titer and distribution range of *Rickettsia* and *Wolbachia* increase, which leads to

the decrease of fluorescence intensity of *Rickettsia* and *Wolbachia* per unit area, at the same time, the detection sensitivity of FISH was lower than that of qPCR, therefore, FISH analysis can not support the increase of the titers of *Rickettsia* and *Wolbachia* within 12-18 h. The reason why the titer of *Rickettsia* and *Wolbachia* decreased in 12-72 h was that it was lost with the transfer of *Rickettsia* and *Wolbachia* in eggs. Symbiotic bacteria may infect other tissues, such as Salivary gland, fat extraction and so on, in the process of transferring in egg, *Rickettsia* and *Wolbachia* was eventually fixed in the middle of the egg, and the titers of *Rickettsia* and *Wolbachia* increased with time.
